# Supplementary material
Source: HighWire-hosted journal article supplement (https://bmjopen.bmj.com/content/9/4/e025091)
Supplement: inline-supplementary-material-1 [file inline-supplementary-material-1.pdf]

**Appendix S1. Database Search Strategy.** Themes were combined with Boolean operator “and” and within-theme were combined with Boolean operator “or”.

| <b>MEDLINE</b>          |                                                                                                                                                                                                                                                                                                                                                                                                                                                         |
|-------------------------|---------------------------------------------------------------------------------------------------------------------------------------------------------------------------------------------------------------------------------------------------------------------------------------------------------------------------------------------------------------------------------------------------------------------------------------------------------|
| <b>Pain</b>             | <ol style="list-style-type: none"> <li>1. Pain, Postoperative/</li> <li>2. pain adj2 postoperati*.tw, kw</li> <li>3. pain adj2 post-operati*.tw, kw</li> <li>4. pain adj2 post operati*.tw, kw</li> <li>5. pain adj1 operati*.tw, kw</li> <li>6. post adj procedur* adj pain.tw, kw</li> <li>7. surg* adj1 pain.tw,kw</li> </ol>                                                                                                                        |
| <b>Pain Measurement</b> | <ol style="list-style-type: none"> <li>1. Pain Measurement/</li> <li>2. Pain adj measurement*.tw,kw</li> <li>3. Numeric adj rating adj scale.tw,kw</li> <li>4. NRS.tw,kw</li> <li>5. Visual adj analogue adj scale.tw,kw</li> <li>6. VAS.tw,kw</li> <li>7. Verbal adj rating adj scale.tw,kw</li> <li>8. VRS.tw,kw</li> </ol>                                                                                                                           |
| <b>Surgery</b>          | <ol style="list-style-type: none"> <li>1. EXP surgical procedures, operative/</li> <li>2. surger*.tw,kw</li> <li>3. operative*.tw,kw</li> <li>4. Surgical.tw,kw</li> <li>5. Operation*.tw,kw</li> </ol>                                                                                                                                                                                                                                                 |
| <b>Predictors</b>       | <ol style="list-style-type: none"> <li>1. predictor*.tw,kw</li> <li>2. Protective factors/ or risk assessment/ or risk factors/</li> <li>3. Risk adj factor*.tw,kw</li> <li>4. risk adj assessment*.tw,kw</li> <li>5. protective adj factor*.tw,kw</li> <li>6. Prevalence/</li> <li>7. Prevalence.tw,kw</li> <li>8. Incidence/</li> <li>9. Incidence.tw,kw</li> <li>10. Prognosis/</li> <li>11. Prognos*.tw,kw</li> <li>12. correlati*.tw,kw</li> </ol> |
| <b>EMBASE</b>           |                                                                                                                                                                                                                                                                                                                                                                                                                                                         |
| <b>Pain</b>             | <ol style="list-style-type: none"> <li>1. Pain, Postoperative/</li> <li>2. Pain adj2 postoperati*.tw,kw</li> <li>3. Pain adj2 post-operati*.tw,kw</li> <li>4. Pain adj2 post operati*.tw,kw</li> </ol>                                                                                                                                                                                                                                                  |

|                         |                                                                                                                                                                                                                                                                                                                                                                                                                                                                                     |
|-------------------------|-------------------------------------------------------------------------------------------------------------------------------------------------------------------------------------------------------------------------------------------------------------------------------------------------------------------------------------------------------------------------------------------------------------------------------------------------------------------------------------|
|                         | <ol style="list-style-type: none"> <li>5. Pain adj1 operati*.tw,kw</li> <li>6. Post adj procedur* adj pain.tw,kw</li> <li>7. Surg* adj1 pain.tw,kw</li> </ol>                                                                                                                                                                                                                                                                                                                       |
| <b>Pain Measurement</b> | <ol style="list-style-type: none"> <li>1. Pain adj measurement*.tw,kw</li> <li>2. Numeric adj rating adj scale.tw,kw</li> <li>3. NRS.tw,kw</li> <li>4. Visual adj analogue adj scale.tw,kw</li> <li>5. VAS.tw,kw</li> <li>6. Verbal adj rating adj scale.tw,kw</li> <li>7. VRS.tw,kw</li> <li>8. Exp pain assessment/ or exp pain measurement/</li> </ol>                                                                                                                           |
| <b>Surgery</b>          | <ol style="list-style-type: none"> <li>1. Exp surgery/</li> <li>2. Surger*.tw,kw</li> <li>3. Operative*.tw,kw</li> <li>4. Operation*.tw,kw</li> </ol>                                                                                                                                                                                                                                                                                                                               |
| <b>Predictors</b>       | <ol style="list-style-type: none"> <li>1. Predictor*.tw,kw</li> <li>2. Risk adj factor*.tw,kw</li> <li>3. Prevalence/</li> <li>4. Prevalence.tw,kw</li> <li>5. Incidence/</li> <li>6. Incidence.tw,kw</li> <li>7. Prognosis/</li> <li>8. Prognos*.tw,kw</li> <li>9. Correlati*.tw,kw</li> <li>10. "Prediction and forecasting"/</li> <li>11. risk assessment/</li> <li>12. risk factor/</li> <li>13. protective adj factor*.tw,kw</li> <li>14. risk adj assessment.tw,kw</li> </ol> |
| <b>PsychInfo</b>        |                                                                                                                                                                                                                                                                                                                                                                                                                                                                                     |
| <b>Pain</b>             | <ol style="list-style-type: none"> <li>1. Pain adj2 postoperati*.tw</li> <li>2. Pain adj2 post-operati*.tw</li> <li>3. Pain adj2 post operati*.tw</li> <li>4. Pain adj1 operati*.tw</li> <li>5. Post adj procedur* adj pain.tw</li> <li>6. Surg* adj1 pain.tw</li> <li>7. Exp Pain</li> </ol>                                                                                                                                                                                       |
| <b>Pain Measurement</b> | <ol style="list-style-type: none"> <li>1. Pain Measurement/</li> <li>2. Pain adj measurement*.tw</li> <li>3. Numeric adj rating adj scale.tw</li> </ol>                                                                                                                                                                                                                                                                                                                             |

|                         |                                                                                                                                                                                                                                                                                                                                                                                |
|-------------------------|--------------------------------------------------------------------------------------------------------------------------------------------------------------------------------------------------------------------------------------------------------------------------------------------------------------------------------------------------------------------------------|
|                         | <ol style="list-style-type: none"> <li>4. NRS.tw</li> <li>5. Visual adj analogue adj scale.tw</li> <li>6. VAS.tw</li> <li>7. Verbal adj rating adj scale.tw</li> <li>8. VRS.tw</li> </ol>                                                                                                                                                                                      |
| <b>Surgery</b>          | <ol style="list-style-type: none"> <li>1. surger*.tw</li> <li>2. operative*.tw</li> <li>3. Surgical.tw</li> <li>4. Operation*.tw</li> <li>5. Exp surgery/</li> </ol>                                                                                                                                                                                                           |
| <b>Predictors</b>       | <ol style="list-style-type: none"> <li>1. predictor*.tw</li> <li>2. Protective factors/ or risk assessment/ or risk factors/</li> <li>3. Risk adj factor*.tw</li> <li>4. risk adj assessment*.tw</li> <li>5. protective adj factor*.tw</li> <li>6. Prevalence.tw</li> <li>7. Incidence.tw</li> <li>8. Prognosis/</li> <li>9. Prognos*.tw</li> <li>10. correlati*.tw</li> </ol> |
| <b>CINAHL</b>           |                                                                                                                                                                                                                                                                                                                                                                                |
| <b>Pain</b>             | <ol style="list-style-type: none"> <li>1. MH “postoperative pain”</li> <li>2. Postoperative pain</li> <li>3. Pain AND (surgery or surgical or operative or operative)”</li> </ol>                                                                                                                                                                                              |
| <b>Pain Measurement</b> | <ol style="list-style-type: none"> <li>1. MH “pain measurement”</li> <li>2. Pain measurement</li> <li>3. Pain assessment or pain scale or pain tool</li> <li>4. Nrs or numeric rating scale</li> <li>5. Vas or visual analogue scale OR visual analog scale</li> <li>6. Vrs or verbral rating scale</li> </ol>                                                                 |
| <b>Surgery</b>          | <ol style="list-style-type: none"> <li>1. MH “surgery, operative”</li> <li>2. Surgery or operation or surgical procedure</li> </ol>                                                                                                                                                                                                                                            |
| <b>Predictors</b>       | <ol style="list-style-type: none"> <li>1. MH “independent variable”</li> </ol>                                                                                                                                                                                                                                                                                                 |

2. Predictors
3. MH “risk factors”
4. MH “risk assessment”
5. Risk factors
6. MH “prevalence”
7. Prevalence
8. Incidence
9. MH “incidence”
10. MH “prognosis”
11. Prognosis
