# Supplementary material
Source: HighWire-hosted journal article supplement (https://bmjopen.bmj.com/content/9/4/e025091)
Supplement: inline-supplementary-material-3 [file inline-supplementary-material-3.pdf]

a)

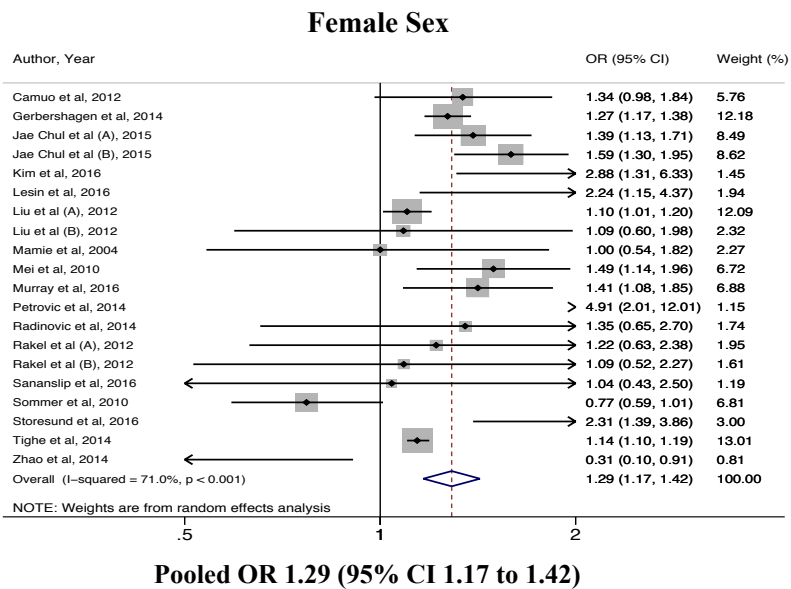

b)

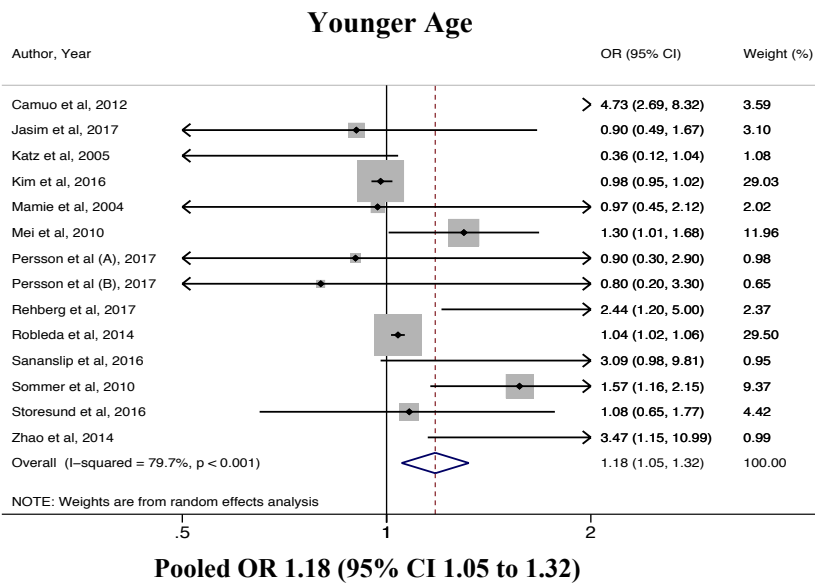

c)

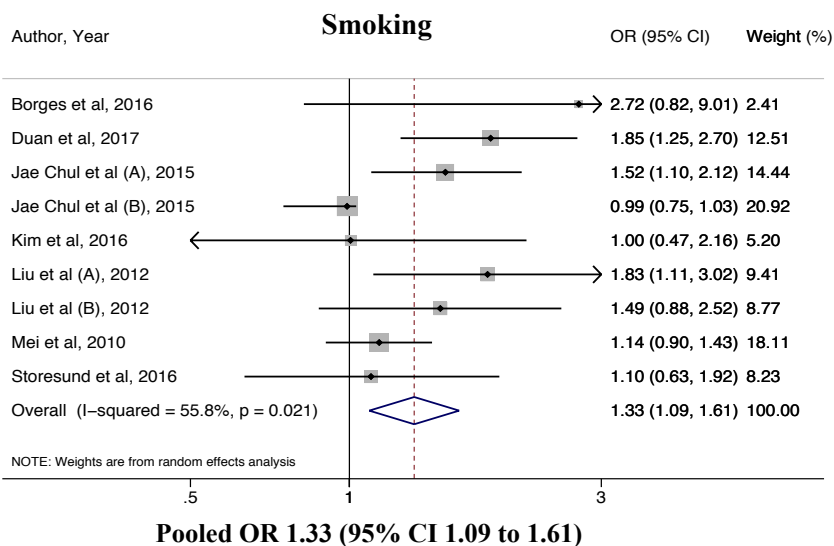

**Figure S1. Forest Plot of Preoperative Predictors of Postoperative Pain. a) female sex b) younger age, and c) smoking history.**

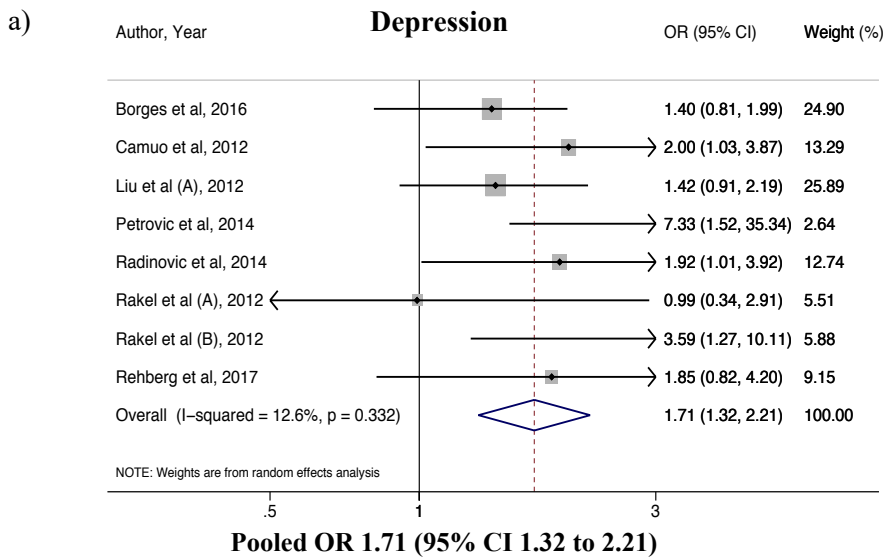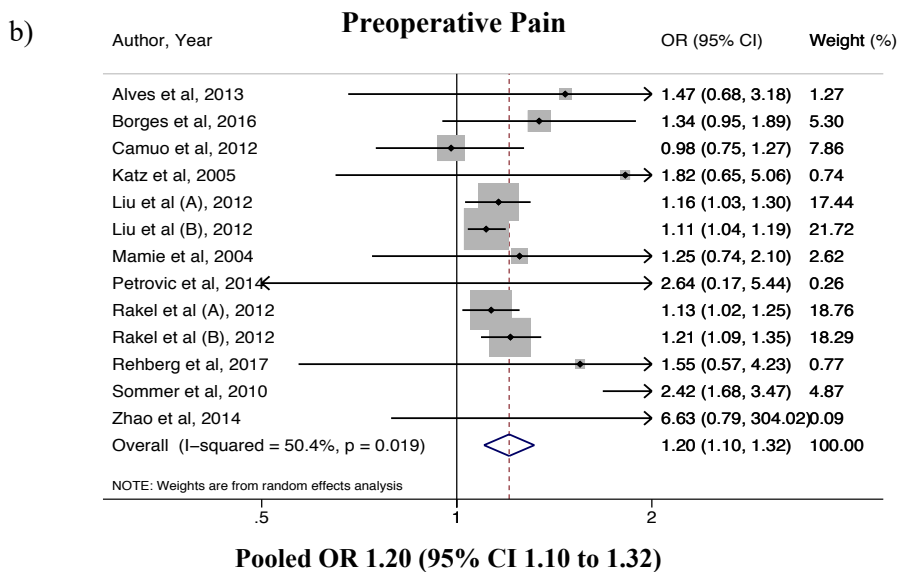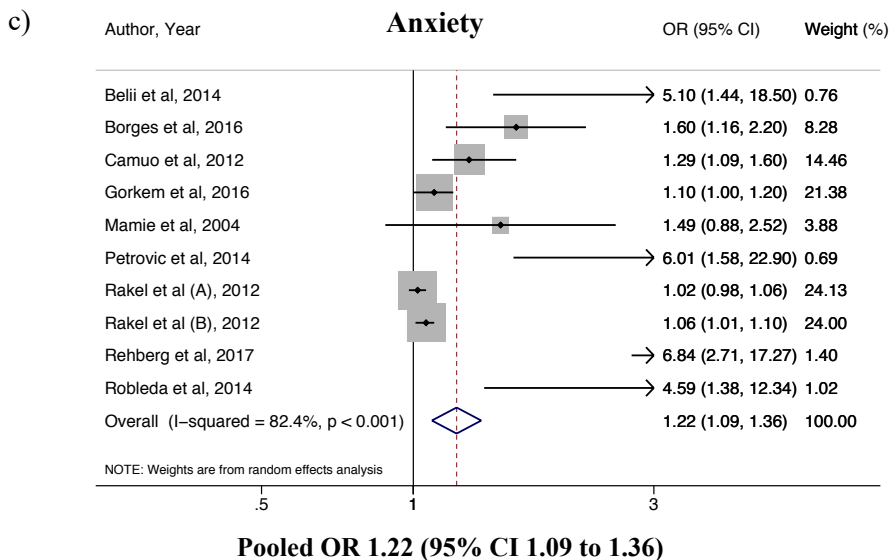

**Figure S2. Forest Plot of Significant Preoperative Predictors of Postoperative Pain.** a) history of depression symptoms, b) presence of preoperative pain, and c) history of anxiety symptoms.

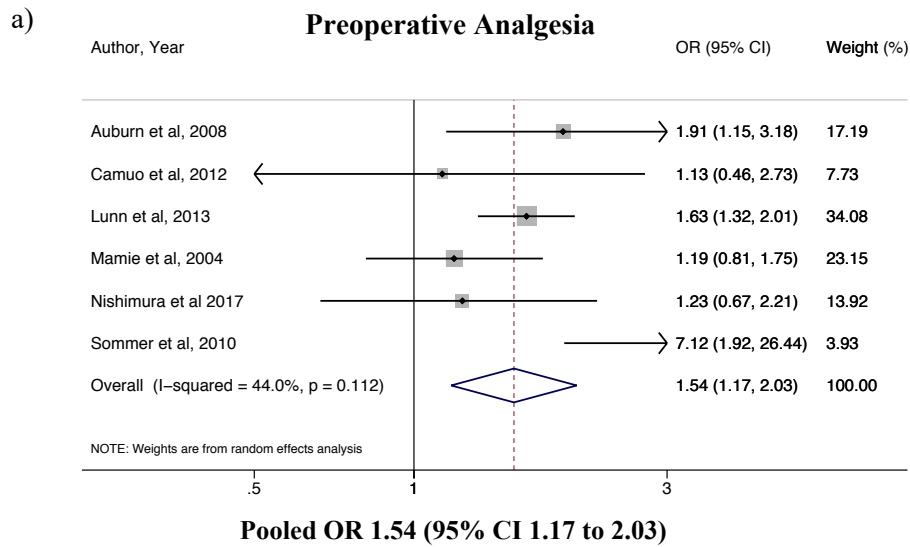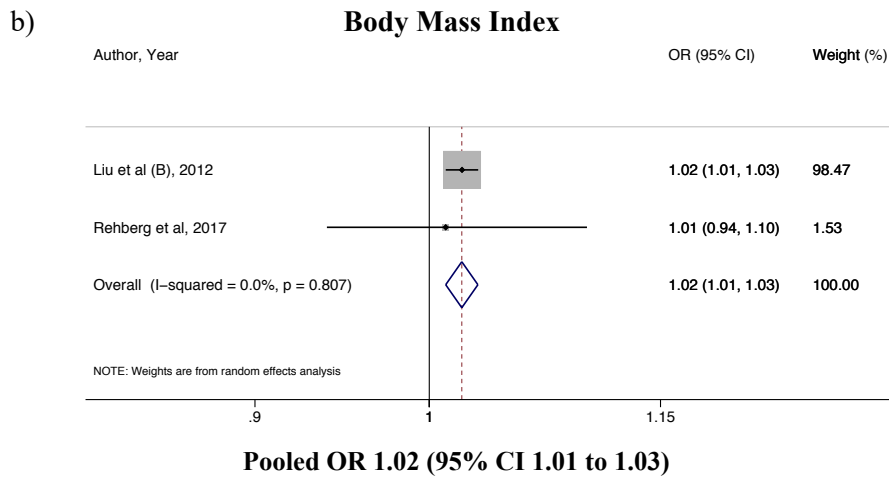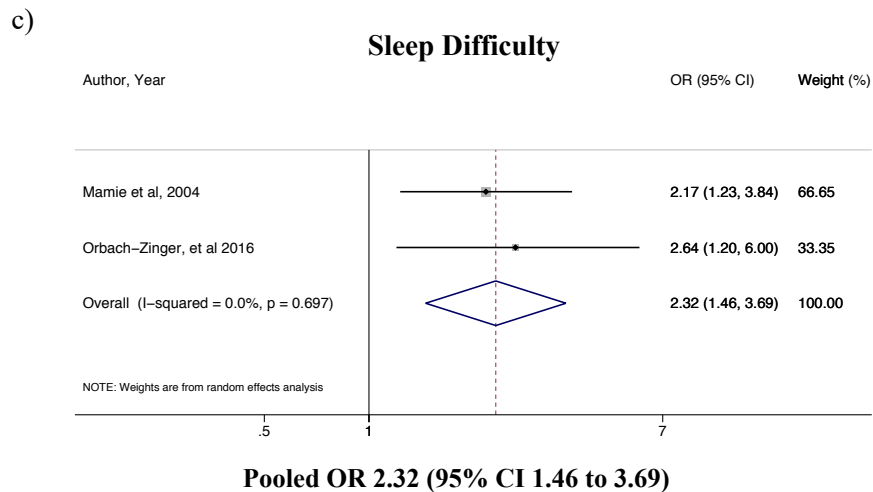

**Figure S3. Forest Plot of Significant Preoperative Predictors of Postoperative Pain.**  
 a) preoperative analgesia, b) body mass index (continuous), and c) history of sleeping difficulty.

a)

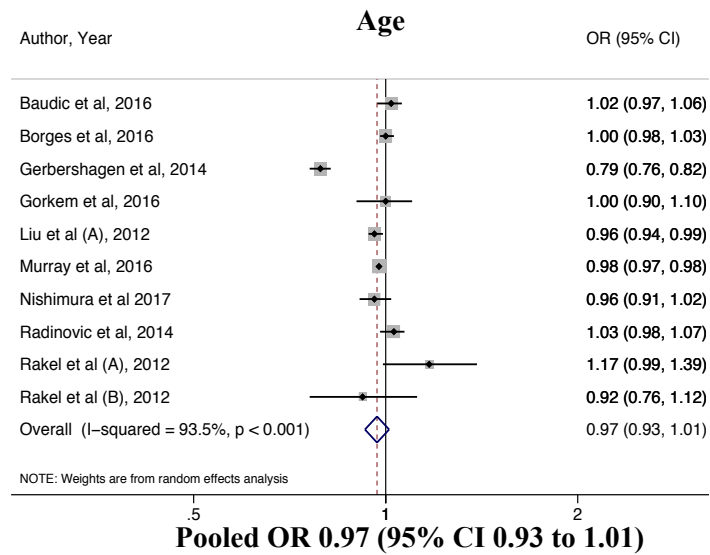

b)

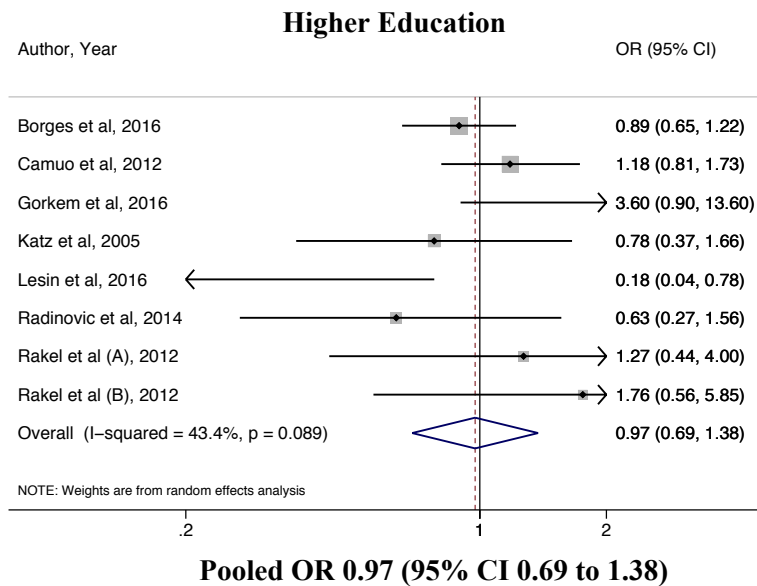

c)

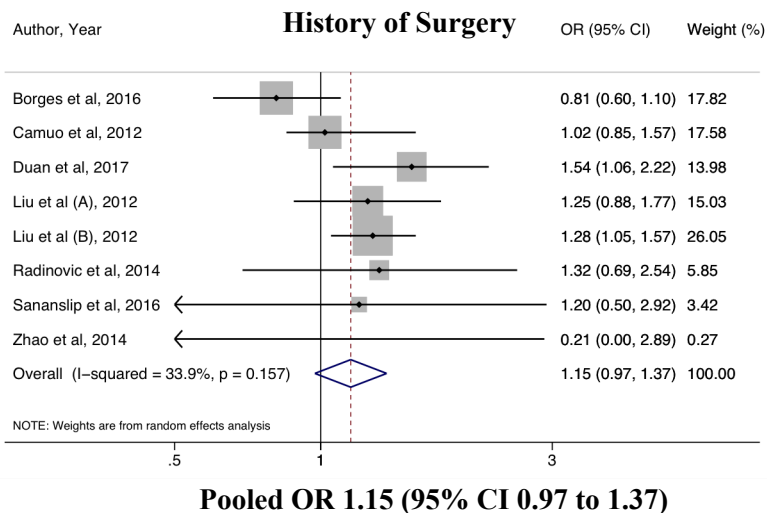

**Figure S4. Forest Plot of Non-Significant Preoperative Predictors of Postoperative Pain. a) age (continuous), b) higher education, and c) history of surgery.**

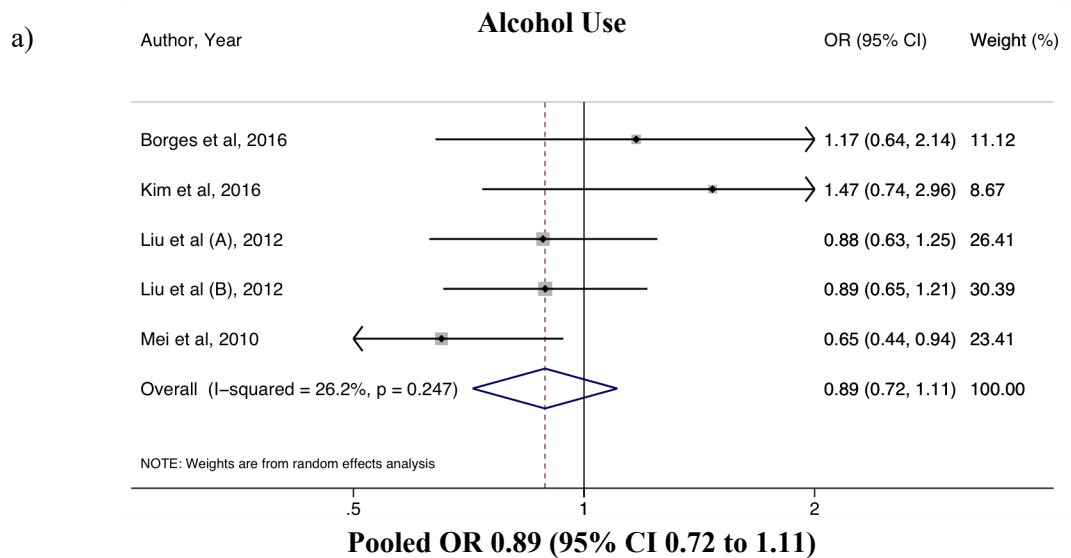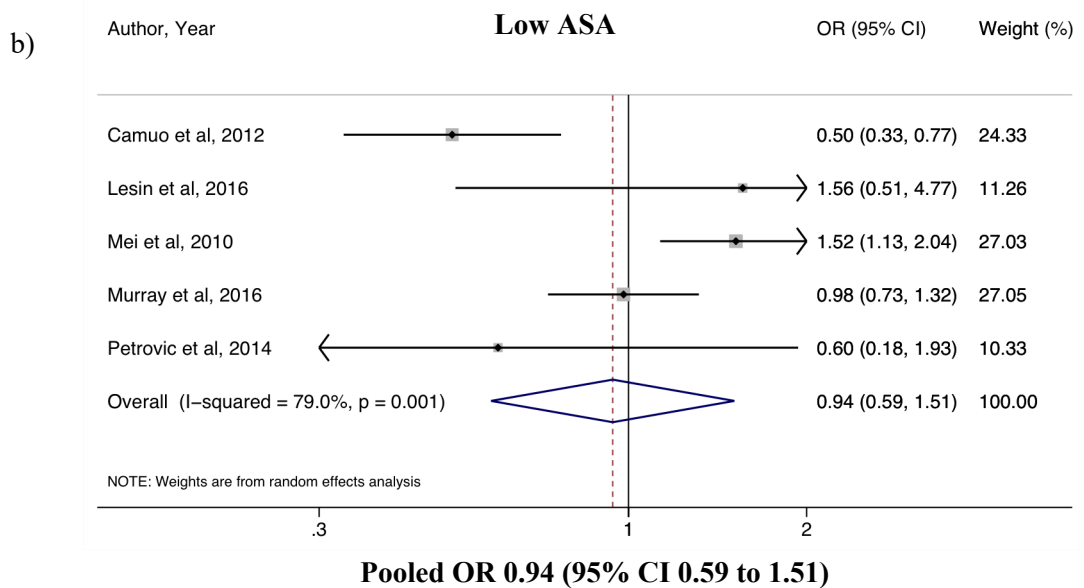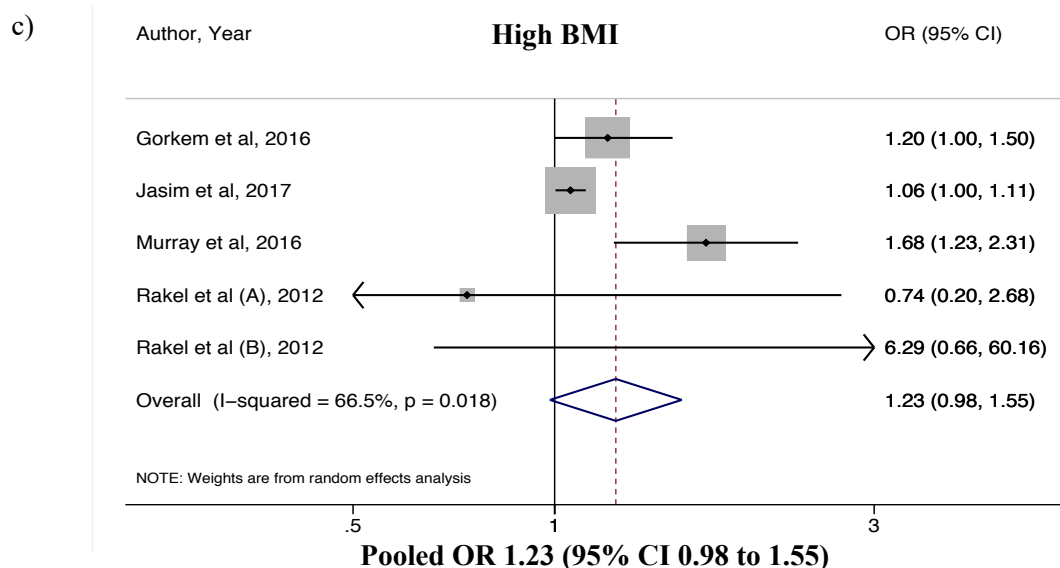

**Figure S5. Forest Plot of Non-Significant Preoperative Predictors of Postoperative Pain.** a) alcohol use, b) low ASA, and c) BMI (dichotomous).

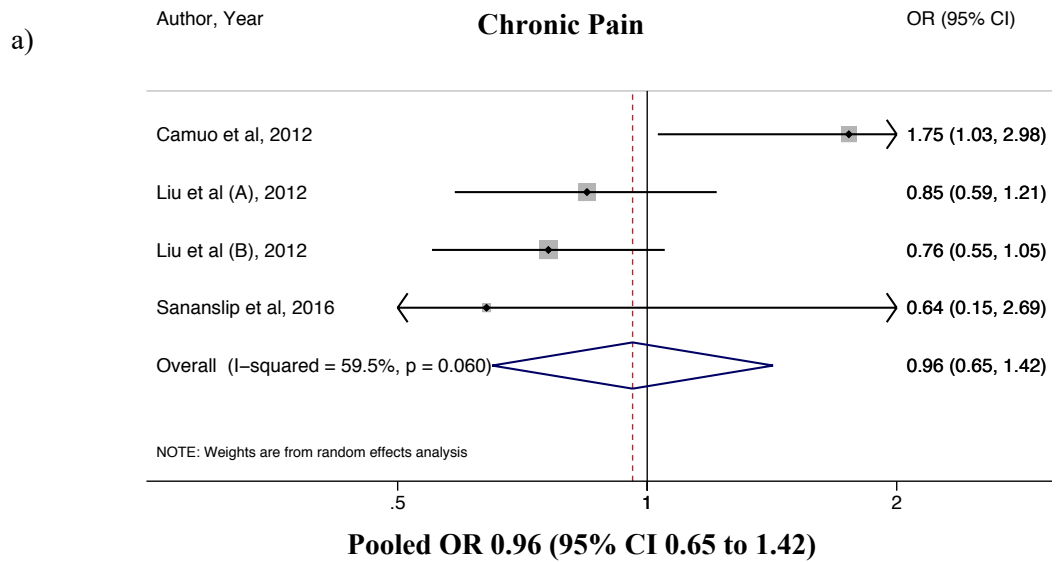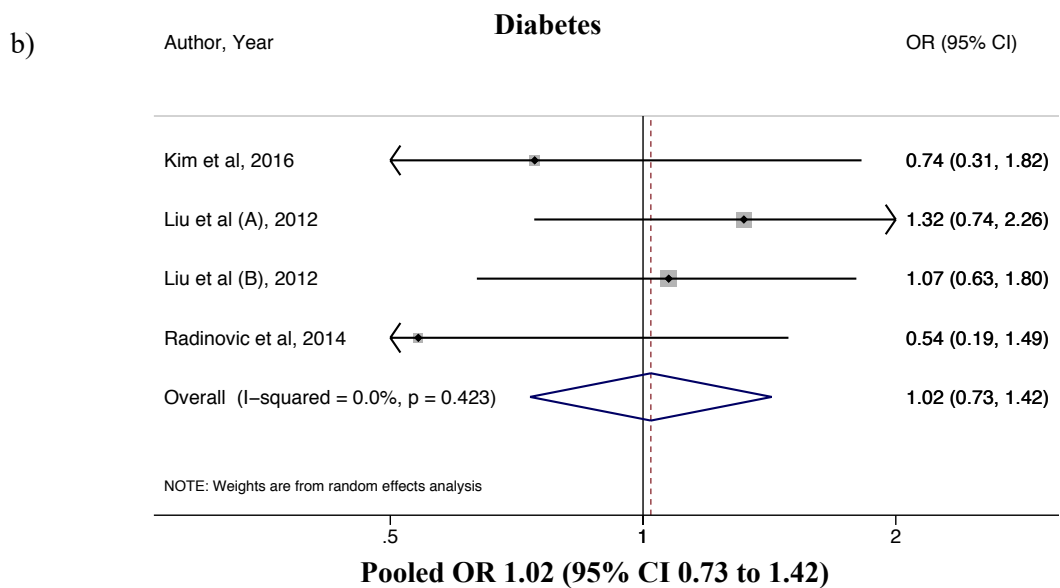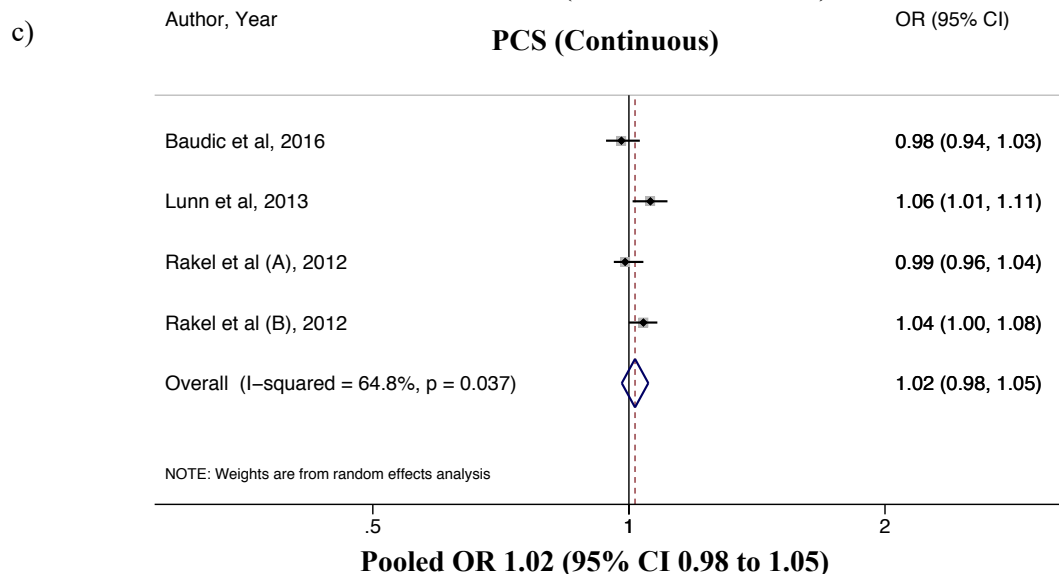

**Figure S6. Forest Plot of Non-Significant Preoperative Predictors of Postoperative Pain.** a) chronic pain, b) diabetes, and c) pain catastrophizing scale (continuous).

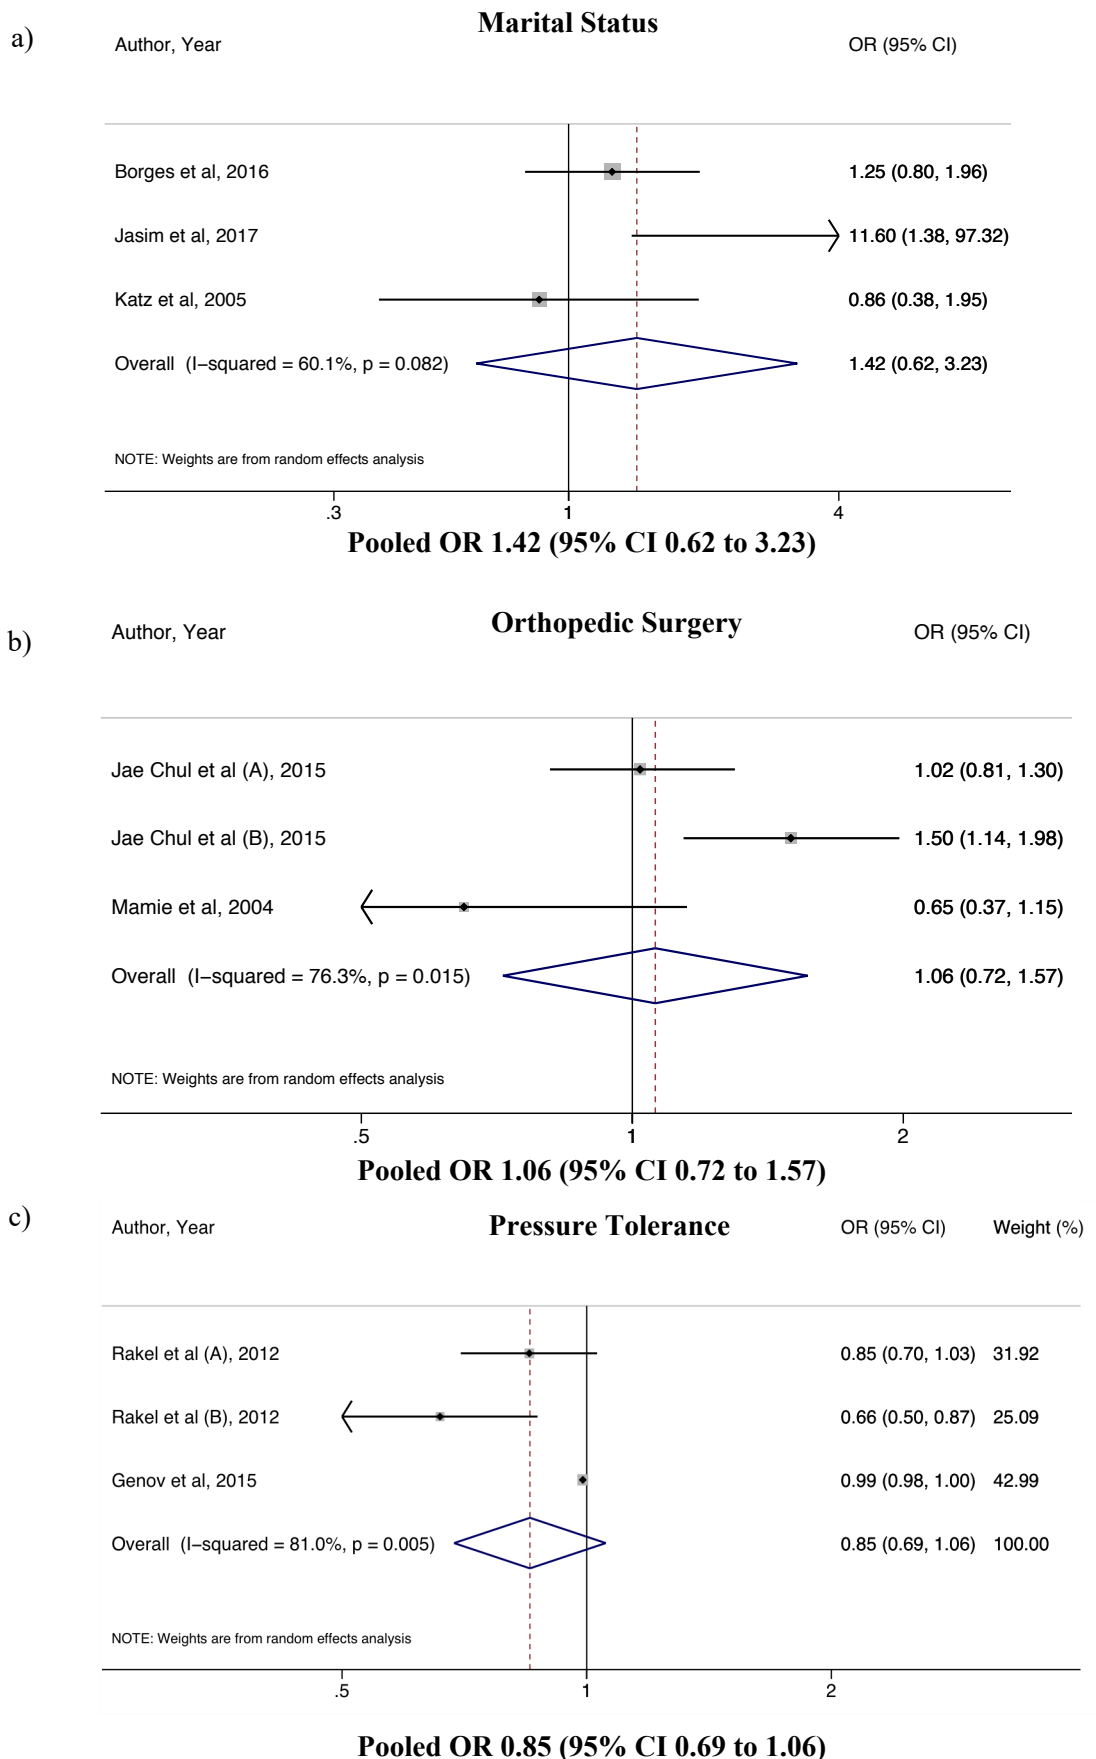

**Figure S7. Forest Plot of Non-Significant Preoperative Predictors of Postoperative Pain. a) marital status, b) orthopedic surgery, and c) preoperative pressure tolerance.**

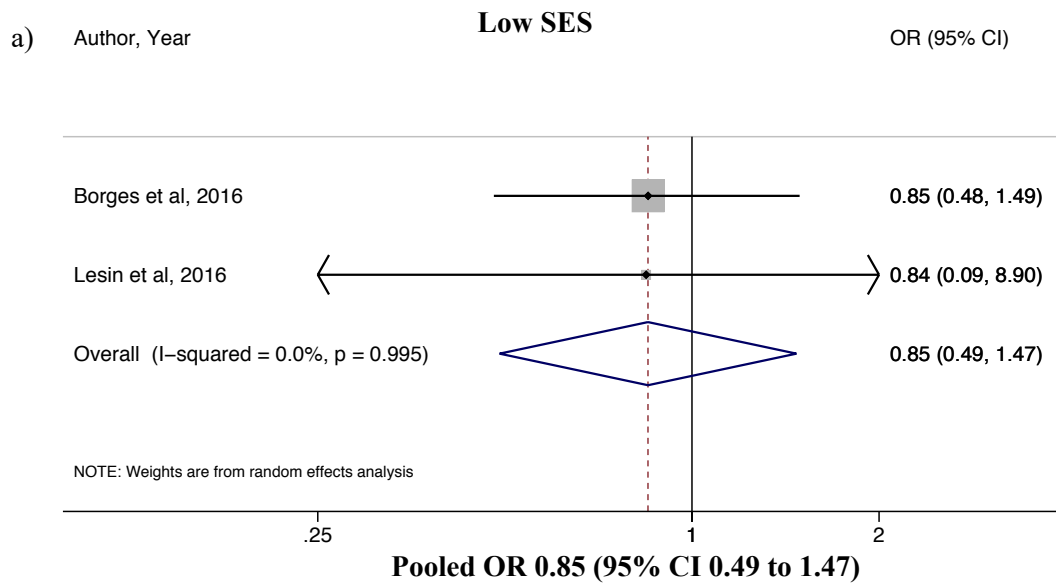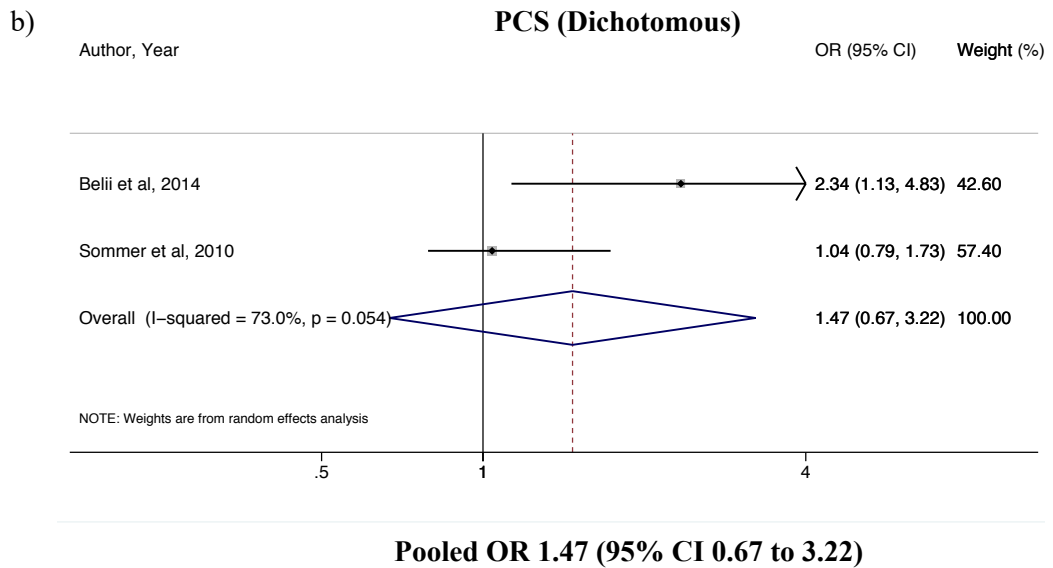

**Figure S8. Forest Plot of Non-Significant Preoperative Predictors of Postoperative Pain. a)** low socioeconomic status and **b)** pain catastrophizing scale (dichotomous).
